# Supplementary material
Source: PubMed Central journal article supplement (PMC3895335)
Supplement: DS_10.1177_0022034513513588.pdf [file DS_10.1177_0022034513513588.pdf]

## RESEARCH REPORTS

### Clinical

S.A. Frazier-Bowers<sup>1\*</sup>, H.M. Hendricks<sup>1</sup>,  
J.T. Wright<sup>2</sup>, J. Lee<sup>1</sup>, K. Long<sup>2</sup>, C.F. Dibble<sup>3</sup>,  
and S. Bencharit<sup>3,4</sup>

<sup>1</sup>Department of Orthodontics, School of Dentistry; <sup>2</sup>Department of Pediatric Dentistry, School of Dentistry; <sup>3</sup>Department of Pharmacology, School of Medicine; and <sup>4</sup>Department of Prosthodontics, School of Dentistry, University of North Carolina at Chapel Hill; \*corresponding author, sylvia\_frazier@dentistry.unc.edu

*J Dent Res* DOI: 10.1177/0022034513513588

# Novel Mutations in *PTH1R* Associated with Primary Failure of Eruption and Osteoarthritis

## APPENDIX

Type I PFE

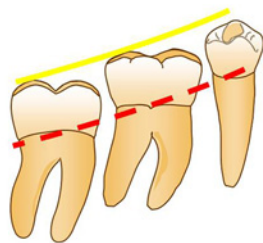

Type II PFE

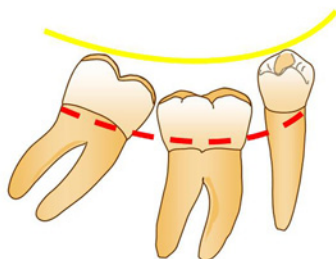

**Figure.** Diagrammatic representation of type I versus type II primary failure of eruption based on a previous study (Frazier-Bowers *et al.*, 2007). Illustrations provided by Dr. Sonny Long.

**Appendix Table 1.** Genotype-Phenotype Correlation of 2 Families Segregating PFE

|                       | PFE Affection         | Other Phenotype             | Arthritis | Mutation      |
|-----------------------|-----------------------|-----------------------------|-----------|---------------|
| Family 1              |                       |                             |           |               |
| I:3                   | Affected              | Edentulous: reported type I | Y         | Unavailable   |
| II:4                  | Affected: type I      | Unilateral/supraosseous     | Y         | c.996_997insC |
| II:13                 | Unaffected            | N/A                         | N         | No mutation   |
| III:1                 | Affected: type I      | Bilateral/supraosseous      | UNK       | c.996_997insC |
| III:3                 | Affected: type I      | Bilateral/supraosseous      | UNK       | c.996_997insC |
| III:9                 | Unaffected            | N/A                         | N         | No mutation   |
| III:10                | Unaffected            | N/A                         | N         | No mutation   |
| III:11                | Unaffected            | N/A                         | N         | No mutation   |
| Family 2 <sup>a</sup> |                       |                             |           |               |
| I:1                   | Unaffected carrier    | N/A                         | Y         | c.572delA     |
| II:2                  | Unaffected carrier    | N/A                         | Y         | c.572delA     |
| II:4                  | Affected <sup>b</sup> | —                           | Y         | Unavailable   |
| III:1                 | Type I                | Bilateral/supraosseous      | UNK       | c.572delA     |
| III:2                 | Affected <sup>b</sup> | —                           | UNK       | Unavailable   |

N/A, not applicable; PFE, primary failure of eruption; UNK, individuals of an age before the onset of symptoms/diagnosis of arthritis.

<sup>a</sup>Family 2 shows incomplete penetrance with 2 individuals carrying mutation but not affected with the eruption phenotype.

<sup>b</sup>Two individuals were not available for sequencing, but one reported symptoms of arthritis, and both reported eruption failure as diagnosed by their dentist.

**Appendix Table 2.** Phenotype-Genotype Correlation of Additional Families Without a Functional *PTH1R* Mutation

|          | PFE Status         | Affection Pattern       | Genetic Alteration/SNP     |
|----------|--------------------|-------------------------|----------------------------|
| Family 3 |                    |                         |                            |
| 1        | Unaffected         | N/A                     | No alteration              |
| 2        | Unaffected         | N/A                     | No alteration              |
| 3        | Unaffected         | N/A                     | No alteration              |
| 4        | Affected: type I   | Bilateral/supraosseous  | c. 1389 T>C, known variant |
| Family 4 |                    |                         |                            |
| 1        | Unaffected         | N/A                     | No alteration              |
| 2        | Affected           | Undetermined            | c.638+97G>A, intronic      |
| 3        | Affected: type II  | Unilateral/supraosseous | c.638+97G>A, intronic      |
| Family 5 |                    |                         |                            |
| 1        | Unaffected         | N/A                     | No alteration              |
| 2        | Unaffected         | N/A                     | No alteration              |
| 3        | Affected: type I   | Bilateral/supraosseous  | c. 646 C>A, synonymous     |
| 4        | Unaffected         | N/A                     | c. 646 C>A, synonymous     |
| 5        | Unaffected         | N/A                     | No alteration              |
| Family 6 |                    |                         |                            |
| 1        | Affected: type II  | Bilateral/supraosseous  | c. 1389 T>C, known variant |
| 2        | Affected: type II  | Bilateral/supraosseous  | c. 1389 T>C, known variant |
| 3        | Affected: type UNK | UNK                     | c. 1389 T>C, known variant |

N/A, not applicable; PFE, primary failure of eruption; SNP, single-nucleotide polymorphism; UNK, individuals of an age before the onset of symptoms/specific phenotype unknown.

Summary of additional families with *PTH1R* SNPs: 4 of 8 showed nonfunctional alterations in *PTH1R*, not including the more commonly occurring SNP c. 1116 +58 T>C, which was found in several affected and unaffected individuals.
